# Supplementary material for: Outpatient administration of CAR T-cell therapies using a strategy of no remote monitoring and early CRS intervention
Source: PubMed Central journal article supplement — Blood Adv. 2024 Jun 20;8(16):4320–9. doi: 10.1182/bloodadvances.2024013239 (PMC11372811; doi:10.1182/bloodadvances.2024013239), 2024-06-20
Supplement: BLOODA_ADV-2024-013239-mmc1.pdf [file BLOODA_ADV-2024-013239-mmc1.pdf]

| Outcomes by CAR product                                                                                                                                                                                              | All patients intended for outpatient administration<br>(n=64)                                                                                                                                                                         |          |          |                    |
|----------------------------------------------------------------------------------------------------------------------------------------------------------------------------------------------------------------------|---------------------------------------------------------------------------------------------------------------------------------------------------------------------------------------------------------------------------------------|----------|----------|--------------------|
| <p>CRS</p> <ul style="list-style-type: none"> <li>• Axi-cel (22)</li> <li>• Brexu-cel (2)</li> <li>• Liso-cel (5)</li> <li>• Tisa-cel (1)</li> <li>• Ide-cel (10)</li> <li>• Cilta-cel (24)</li> </ul>               | <p>80% (51, all grade 1-2)</p> <p>82% (18)</p> <p>100% (2)</p> <p>80% (4)</p> <p>100% (1)</p> <p>100% (10)</p> <p>67% (16)</p>                                                                                                        |          |          |                    |
| <p>ICANS</p> <ul style="list-style-type: none"> <li>• Axi-cel (22)</li> <li>• Brexu-cel (2)</li> <li>• Liso-cel (5)</li> <li>• Tisa-cel (1)</li> <li>• Ide-cel (10)</li> <li>• Cilta-cel (24)</li> </ul>             | <p>31% (20 grade 1-2=9, grade 3-4=11)</p> <p>50% (11, grade 1-2=4, grade 3-4=7)</p> <p>50% (1, grade 4)</p> <p>20% (1, grade 3)</p> <p>100% (1, grade 1)</p> <p>30% (3, grade 1-2=1, grade 3-4=2)</p> <p>12.5% (3, all grade 1-2)</p> |          |          |                    |
| <p>30-day Admissions</p> <ul style="list-style-type: none"> <li>• Axi-cel (22)</li> <li>• Brexu-cel (2)</li> <li>• Liso-cel (5)</li> <li>• Tisa-cel (1)</li> <li>• Ide-cel (10)</li> <li>• Cilta-cel (24)</li> </ul> | Total                                                                                                                                                                                                                                 | Days 0-3 | Days 4-7 | Days 8-30          |
|                                                                                                                                                                                                                      | 14                                                                                                                                                                                                                                    | 6        | 7        | 1 (2 readmissions) |
|                                                                                                                                                                                                                      | 2                                                                                                                                                                                                                                     | 0        | 2        | 0                  |
|                                                                                                                                                                                                                      | 4                                                                                                                                                                                                                                     | 2        | 2        | 0                  |
|                                                                                                                                                                                                                      | 1                                                                                                                                                                                                                                     | 1        | 0        | 0                  |
|                                                                                                                                                                                                                      | 7                                                                                                                                                                                                                                     | 6        | 1        | 0 (1 readmission)  |
|                                                                                                                                                                                                                      | 14                                                                                                                                                                                                                                    | 2        | 4        | 8 (1 readmission)  |

Supplementary Table 1: Rates of CRS, ICANS and admission in the different CAR T-cell products

Abbreviations: Axi-cel, axicabtagene ciloleucel; Liso-cel, lisocabtagene maraleucel; Brexu-cel, brexucabtagene autoleucel; Cilta-cel, ciltacabtagene autoleucel; Ide-cel, idecabtagene vicleucel; Tisa-cel, tisagenlecleucel, FluCy, fludarabine and cyclophosphamide; CRS, cytokine release syndrome; ICANS, Immune effector cell-associated neurotoxicity syndrome

| Historical control baseline characteristics                                                                                                             | Patients with inpatient cell infusion<br>(n=24) |
|---------------------------------------------------------------------------------------------------------------------------------------------------------|-------------------------------------------------|
| Median age (range)                                                                                                                                      | 67 (23-78)                                      |
| Female                                                                                                                                                  | 39% (9)                                         |
| Histology <ul style="list-style-type: none"> <li>• Aggressive B-cell lymphoma</li> <li>• Mantle cell lymphoma</li> <li>• Myeloma</li> </ul>             | 83.3% (20)<br>8.3% (2)<br>8.3% (2)              |
| <ul style="list-style-type: none"> <li>• Median prior lines of therapy (range)</li> </ul>                                                               | 4 (2-7)                                         |
| Type of CAR <ul style="list-style-type: none"> <li>• Axi-cel</li> <li>• Tisa-cel</li> <li>• Liso-cel</li> <li>• Brexu-cel</li> <li>• Ide-cel</li> </ul> | 13<br>5<br>2<br>2<br>2                          |
| Lymphodepletion <ul style="list-style-type: none"> <li>• Flu-Cy</li> </ul>                                                                              | 100% (24)                                       |

Supplementary Table 2: Baseline characteristics of patients who received inpatient CAR T-cell therapy between 2020-2021

Abbreviations: Axi-cel, axicabtagene ciloleucel; Liso-cel, lisocabtagene maraleucel; Brexu-cel, brexucabtagene autoleucel; Cilta-cel, ciltacabtagene autoleucel; Ide-cel, idecabtagene vicleucel; Tisa-cel, tisagenlecleucel, Flu-Cy, fludarabine and cyclophosphamide.
